# Supplementary material for: Earliest Stone-Tipped Projectiles from the Ethiopian Rift Date to >279,000 Years Ago
Source: PLoS One. 2013 Nov 13;8(11):e78092. doi: 10.1371/journal.pone.0078092 (PMC3827237; doi:10.1371/journal.pone.0078092)
Supplement: Data S1 — Full Ar data for Trench1step1 and Trench1step2 samples. (XLS) [file pone.0078092.s004.xls]

## Sheet: Sheet1
		Relative Abundances															Renne et al. (1998), Steiger and Jager (1977):				Renne et al. (2010, 2011):			Isochron
Run ID	Sample	40Ar	± 40Ar (1σ)	39Ar	± 39Ar (1σ)	38Ar	± 38Ar (1σ)	37Ar	± 37Ar (1σ)	36Ar	± 36Ar (1σ)	40Ar*/39Ar	±40Ar*/39Ar (1σ)	%40Ar*	±%40Ar* (1σ)		Age (Ma)	± Age w/o J (1σ)	± w/ J (1σ)		Age (Ma)	± (1σ), full systematic		36Ar/40Ar	±% 36Ar/40Ar (1σ)	39Ar/40Ar	±% 39Ar/40Ar (1σ)	±% 39Ar/36Ar (1σ)	ρ 40Ar/39Ar	ρ 36Ar/39Ar
61114-01A	Trench 1 Step 1	0.159924	0.000286	0.0121835	5.95e-05	0.0001628	2.64e-05	4.1e-05	3.49e-05	0.000176	6.29365e-06	8.80757	0.171169	67.1518	1.19544		1.20125	0.0233376	0.0234946		1.21298	0.0238491		0.0011002	3.68089	0.0762432	0.571424	3.66736	0.946202	0.177303
61114-03A	Trench 1 Step 1	0.0210457	0.000255	0.0068338	4.97e-05	9.87e-05	2.64e-05	1.59e-05	3.62e-05	2.66e-05	5.58032e-06	1.91525	0.247436	62.2517	8.05181		0.261286	0.0337536	0.0337588		0.26476	0.0344412		0.0012643	21.0332	0.325031	1.46362	21.0021	0.996298	0.0604954
61114-04A	Trench 1 Step 1	0.0164226	0.000214	0.0067762	7.43e-05	0.0001113	2.8e-05	-2.31e-05	3.77e-05	1.3e-05	6.57951e-06	1.84876	0.292373	76.3648	12.0821		0.252215	0.0398838	0.0398879		0.253832	0.0412512		0.0007916	50.6544	0.413059	1.75673	50.6459	0.999178	0.0244712
61114-05A	Trench 1 Step 1	0.0257079	0.0002267	0.0046874	3.75e-05	6.75e-05	2.8e-05	-2.71e-05	3.72e-05	5.3e-05	6.50692e-06	2.10179	0.418789	38.3582	7.62026		0.286731	0.0571277	0.0571313		0.290255	0.0565597		0.0020646	12.3248	0.182503	1.23733	12.3058	0.991233	0.0783085
61114-06A	Trench 1 Step 1	0.0290698	0.0002404	0.0055416	4.3e-05	9.04e-05	2.64e-05	4.93181e-06	3.58e-05	4.79e-05	5.64004e-06	2.66464	0.308862	50.8422	5.8711		0.363509	0.0421306	0.0421386		0.36506	0.0429973		0.0016465	11.8477	0.190803	1.17977	11.8304	0.99101	0.0784293
61114-08A	Trench 1 Step 1	0.0204238	0.0002404	0.0057869	6.69e-05	0.0001009	2.69e-05	-5.57e-05	3.77e-05	2.83e-05	5.58032e-06	2.06171	0.292343	58.4759	8.27799		0.281264	0.0398792	0.0398842		0.28384	0.0381829		0.0013908	19.7073	0.283629	1.70077	19.6974	0.994821	0.0560469
61114-10A	Trench 1 Step 1	0.0171103	0.0001943	0.0049595	4.3e-05	4.75e-05	2.59e-05	2.47e-05	3.83e-05	2.59e-05	6.72681e-06	1.89186	0.407402	54.8877	11.8157		0.258094	0.0555753	0.0555784		0.26038	0.057245		0.001511	26.0673	0.290126	1.47827	26.0501	0.99756	0.0445287
61114-11A	Trench 1 Step 1	0.0326892	0.000255	0.0038691	3.91e-05	8.34e-05	2.86e-05	1.09e-05	3.77e-05	3.71e-05	5.52178e-06	5.57951	0.436471	66.0939	5.13347		0.761071	0.059524	0.0595488		0.766517	0.0604453		0.0011357	14.9231	0.118458	1.32094	14.9265	0.99355	0.0551621
61114-12A	Trench 1 Step 1	0.0227993	0.0001928	0.0061611	7.34e-05	9.09e-05	2.69e-05	-1.13e-05	3.77e-05	4.19e-05	6.87677e-06	1.66888	0.335819	45.1418	9.05777		0.227676	0.0458112	0.0458141		0.229316	0.0471291		0.0018374	16.4652	0.270492	1.50803	16.4775	0.993729	0.0496681
61114-13A	Trench 1 Step 1	0.0421797	0.000255	0.0085764	8.19e-05	0.0001618	2.98e-05	8.95782e-06	3.77e-05	8.01e-05	5.76281e-06	2.12796	0.20578	43.307	4.13546		0.290302	0.0280707	0.0280783		0.292559	0.029485		0.0018989	7.27326	0.203514	1.17399	7.29034	0.976372	0.0989395
61114-14A	Trench 1 Step 1	0.045869	0.000255	0.0058192	4.22e-05	0.0001216	2.8e-05	-2.89e-05	3.83e-05	0.0001173	6.29365e-06	1.86044	0.330674	23.6233	4.13903		0.253808	0.0451086	0.0451123		0.256455	0.0448092		0.0025582	5.46099	0.126977	0.95766	5.45249	0.965674	0.138208
61114-15A	Trench 1 Step 1	0.0236133	0.0002404	0.0099134	5.32e-05	8.44e-05	2.86e-05	2.65e-05	3.94e-05	1.26e-05	5.3535e-06	2.00094	0.163584	84.0924	6.90555		0.272974	0.022315	0.0223235		0.275322	0.0224262		0.0005328	42.5924	0.420264	1.19885	42.5794	0.999292	0.0270778
61114-17A	Trench 1 Step 1	0.0210016	0.000255	0.0057398	6.59e-05	6.94e-05	2.69e-05	4.96e-05	3.67e-05	2.74e-05	5.24786e-06	2.23611	0.278344	61.1688	7.60274		0.305054	0.037969	0.0379753		0.308491	0.0396288		0.0013006	19.2782	0.27355	1.72328	19.2653	0.994483	0.0591287
61114-19A	Trench 1 Step 1	0.0159731	0.000255	0.0035685	6.32e-05	6.29e-05	2.64e-05	-3.82471e-06	3.94e-05	2.62e-05	5.64004e-06	2.28279	0.479592	51.0467	10.703		0.311421	0.0654211	0.0654249		0.317022	0.0639706		0.0016396	21.6206	0.223615	2.44674	21.6264	0.992392	0.0596319
61114-20A	Trench 1 Step 1	0.0203766	0.0002202	0.0057964	6.96e-05	4.38e-05	2.59e-05	-2.51e-05	4.12e-05	3.03e-05	6.50692e-06	1.94716	0.338485	55.4451	9.62027		0.265638	0.0461739	0.0461778		0.269452	0.0460621		0.0014923	21.4511	0.284749	1.66639	21.45	0.995756	0.046842
61114-22A	Trench 1 Step 1	0.0252922	0.0002476	0.0037781	3.54e-05	5.19e-05	2.64e-05	-2.71e-05	3.72e-05	1.13e-05	5.46443e-06	5.78728	0.440667	86.5293	6.58461		0.789406	0.0600953	0.0601217		0.798456	0.0604929		0.0004512	47.9153	0.149516	1.40173	47.9109	0.999326	0.020935
61114-23A	Trench 1 Step 1	0.0222905	0.0002404	0.006836	4.72e-05	0.0001048	2.8e-05	2.58e-05	3.94e-05	2.64e-05	5.46443e-06	2.10636	0.242104	64.6601	7.43795		0.287355	0.0330258	0.0330322		0.290402	0.0339809		0.0011837	20.7655	0.306975	1.32883	20.7402	0.99664	0.0560623
61114-25A	Trench 1 Step 1	0.0218339	0.0002404	0.0039197	4.22e-05	8.98e-05	2.98e-05	-2.16e-05	3.67e-05	4.72e-05	6.65282e-06	1.97108	0.511919	35.4181	9.1776		0.268901	0.0698324	0.0698351		0.271737	0.0742425		0.0021631	14.1603	0.179689	1.58982	14.1465	0.990875	0.0750482
61114-26A	Trench 1 Step 1	0.0249515	0.0002476	0.0072667	4.55e-05	9.14e-05	2.64e-05	-2.48e-05	3.94e-05	3.25e-05	5.46443e-06	2.09368	0.228016	61.0358	6.6475		0.285625	0.031104	0.0311107		0.288986	0.0316636		0.0013051	16.8394	0.291524	1.22056	16.8113	0.995376	0.0657736
61114-27A	Trench 1 Step 1	0.0295541	0.000255	0.0070012	4.63e-05	8.59e-05	2.75e-05	-3.23e-05	3.88e-05	4.51e-05	5.58032e-06	2.2936	0.242153	54.3865	5.72755		0.312896	0.0330321	0.0330396		0.316545	0.0334563		0.0015278	12.4235	0.237123	1.13321	12.3976	0.992169	0.0797365
61114-28A	Trench 1 Step 1	0.0490523	0.000286	0.0034583	4.47e-05	0.0001304	2.92e-05	-1.09e-05	4e-05	0.0001402	6.0208e-06	2.07589	0.537755	14.6477	3.71484		0.283198	0.0733562	0.073359		0.286881	0.0741664		0.0028588	4.41771	0.070561	1.46164	4.53616	0.918974	0.139275
61114-29A	Trench 1 Step 1	0.104971	0.0002404	0.005158	7.06e-05	0.0001265	2.64e-05	-1.75e-05	3.72e-05	0.0002962	6.87677e-06	3.19845	0.430766	15.7292	1.97059		0.436322	0.0587566	0.0587648		0.44168	0.0570963		0.0028226	2.48199	0.0491774	1.43058	2.78163	0.777245	0.182578
61114-31A	Trench 1 Step 1	0.0184699	0.000214	0.0042365	4.06e-05	3.22e-05	2.69e-05	-4.73057e-06	3.58e-05	3.22e-05	5.46443e-06	2.08848	0.389585	47.9486	8.93282		0.284916	0.0531439	0.0531478		0.28885	0.0506048		0.0017434	17.0379	0.229586	1.55397	17.0151	0.993889	0.0676369
61114-32A	Trench 1 Step 1	0.0590149	0.000286	0.00624	4.72e-05	9.52e-05	2.69e-05	-4.36e-05	3.72e-05	0.0001591	6.22415e-06	1.83959	0.30926	19.4682	3.18991		0.250964	0.0421875	0.0421913		0.255771	0.0436528		0.0026973	4.03219	0.105829	0.941458	4.03624	0.938188	0.174884
61114-33A	Trench 1 Step 1	0.0208764	0.0002476	0.0060377	4.72e-05	8.41e-05	2.86e-05	1.93e-05	3.67e-05	2.72e-05	6.57951e-06	2.11455	0.328671	61.2136	9.51878		0.288471	0.0448345	0.0448392		0.290302	0.0454173		0.0012991	24.3132	0.289488	1.47026	24.2892	0.997214	0.0507204
61114-35A	Trench 1 Step 1	0.0187388	0.000255	0.0049379	4.14e-05	4.95e-05	2.69e-05	-1.51e-05	3.72e-05	2.82e-05	5.3535e-06	2.0846	0.328815	54.9858	8.67845		0.284386	0.0448543	0.0448589		0.282376	0.0449642		0.0015077	19.0256	0.263772	1.65113	18.9852	0.994666	0.0724186
61114-36A	Trench 1 Step 1	0.0142532	0.0002267	0.0034467	3.75e-05	3.81e-05	2.69e-05	-2.7e-05	3.83e-05	1.51e-05	5.3535e-06	2.81803	0.469678	68.2124	11.3878		0.384432	0.0640661	0.0640719		0.389355	0.0666753		0.0010647	35.3377	0.242057	1.98593	35.3129	0.997968	0.0429789
61114-37A	Trench 1 Step 1	0.017809	0.0002404	0.0040603	4.22e-05	8.68e-05	2.86e-05	-3.45e-05	3.83e-05	3.21e-05	6.57951e-06	2.01437	0.488342	45.9706	11.1374		0.274806	0.0666159	0.0666188		0.278266	0.0645378		0.0018097	20.4856	0.228214	1.75734	20.4584	0.99497	0.0635853
61114-39A	Trench 1 Step 1	0.0857972	0.0002267	0.0140255	8.48e-05	0.0002282	3.18e-05	-1.96e-05	3.72e-05	0.0001796	6.43506e-06	2.29136	0.143518	37.491	2.25837		0.312591	0.0195772	0.0195899		0.316915	0.019376		0.0020937	3.69182	0.163619	0.705852	3.69079	0.940405	0.175666
61114-40A	Trench 1 Step 1	0.0275653	0.0002267	0.0046949	5.68e-05	6.19e-05	2.69e-05	-3.16e-05	3.83e-05	6.52e-06	6.0208e-06	5.44701	0.391918	92.8591	6.62147		0.743	0.0534486	0.053475		0.747997	0.0548251		0.0002392	91.3537	0.170477	1.50974	91.3563	0.999796	0.0087019
61114-41A	Trench 1 Step 1	0.0163354	0.0002025	0.0079661	4.14e-05	0.0001004	2.8e-05	-2.11366e-06	3.72e-05	1.45e-05	6.29365e-06	1.5051	0.237427	73.4803	11.6143		0.205335	0.0323893	0.0323926		0.208723	0.0315636		0.0008883	43.4226	0.488208	1.39471	43.4035	0.999184	0.031189
61114-42A	Trench 1 Step 1	0.0184361	0.0002267	0.0045547	4.22e-05	7.05e-05	2.55e-05	-1.34e-05	3.77e-05	2.92e-05	5.3535e-06	2.12999	0.355578	52.6729	8.78796		0.290578	0.0485048	0.0485093		0.293717	0.0485918		0.0015852	18.3879	0.247292	1.5909	18.3602	0.994581	0.0667531
61114-43A	Trench 1 Step 1	0.0366176	0.0002476	0.0080824	4.63e-05	6.63e-05	2.64e-05	-4.85e-05	3.94e-05	6.82e-05	5.64004e-06	2.00448	0.212435	44.2866	4.66177		0.273457	0.0289789	0.0289855		0.275576	0.0298535		0.0018661	8.32889	0.220938	0.931711	8.30156	0.985569	0.105033
61114-44A	Trench 1 Step 1	0.0250542	0.0002267	0.0032228	5.24e-05	3.54e-05	2.59e-05	-5e-05	3.88e-05	6.24e-05	6.36396e-06	1.97899	0.596812	25.4806	7.64553		0.26998	0.0814129	0.0814152		0.273277	0.0808461		0.002496	10.2563	0.128755	1.91079	10.3323	0.97748	0.0721211
61114-47A	Trench 1 Step 1	0.0641398	0.0003748	0.0029487	3.33e-05	8.28e-05	2.75e-05	-1.88e-05	3.38e-05	0.0001684	5.73149e-06	4.69415	0.616437	21.5991	2.73787		0.640325	0.0840727	0.0840851		0.650144	0.083044		0.002626	3.5581	0.0460128	1.31552	3.64856	0.890391	0.184952
61114-48A	Trench 1 Step 1	0.0282744	0.0003002	0.0046635	4.55e-05	6.34e-05	2.69e-05	1.99e-05	3.38e-05	6e-05	6.37809e-06	2.22234	0.415631	36.6869	6.83515		0.303176	0.0566964	0.0567005		0.307711	0.0572431		0.0021206	10.7291	0.165082	1.49045	10.7051	0.98542	0.098882
61114-49A	Trench 1 Step 1	0.0334722	0.0003342	0.0044221	3.98e-05	8.8e-05	2.69e-05	-1.81e-05	3.33e-05	8.28e-05	5.8e-06	1.9712	0.402639	26.066	5.28151		0.268917	0.0549252	0.0549285		0.270739	0.0554819		0.0024764	7.12402	0.132234	1.39224	7.08731	0.969655	0.144624
61114-50A	Trench 1 Step 1	0.0260478	0.0002786	0.005509	3.98e-05	0.000102	2.64e-05	5.41e-05	3.5e-05	5.59e-05	6.52993e-06	1.7053	0.358865	36.0983	7.57657		0.232644	0.0489548	0.0489576		0.235234	0.0497959		0.0021403	11.7977	0.211684	1.33913	11.7562	0.989473	0.0971668
61114-51A	Trench 1 Step 1	0.0482591	0.0002823	0.0060445	4.63e-05	0.0001183	2.8e-05	3.16e-05	3.33e-05	0.0001252	5.59732e-06	1.80328	0.286324	22.6056	3.5178		0.246011	0.0390588	0.0390628		0.244342	0.0416948		0.0025923	4.59412	0.125358	1.00801	4.58716	0.94917	0.165613
61114-52A	Trench 1 Step 1	0.0254718	0.0003053	0.0035526	3.83e-05	5.97e-05	2.69e-05	2.64e-05	3.5e-05	6.46e-05	6.22897e-06	1.74526	0.533187	24.3622	7.41143		0.238096	0.0727349	0.0727369		0.243158	0.0712277		0.0025334	9.76977	0.13959	1.66312	9.73793	0.979541	0.117611
61114-53A	Trench 1 Step 1	0.0339474	0.0002864	0.0065615	4.63e-05	6.69e-05	2.86e-05	3.56e-05	3.38e-05	7.98e-05	5.28015e-06	1.54227	0.246852	29.8363	4.73189		0.210404	0.0336749	0.0336783		0.212844	0.0346811		0.0023501	6.73035	0.193457	1.14578	6.68967	0.972917	0.142998
61114-54A	Trench 1 Step 1	0.0749808	0.000428	0.0072932	7.81e-05	0.0001524	2.8e-05	2.3e-05	3.38e-05	0.000189	5.8e-06	2.54534	0.256342	24.7789	2.38728		0.347235	0.0349669	0.0349757		0.351669	0.034861		0.0025195	3.23886	0.0973502	1.25727	3.32046	0.874622	0.205587
61114-55A	Trench 1 Step 1	0.0215116	0.0003002	0.0032562	3.68e-05	7.8e-05	2.55e-05	-3.85e-05	3.33e-05	6.29e-05	5.34135e-06	0.833018	0.50109	12.6218	7.55432		0.113648	0.0683611	0.0683616		0.114969	0.0698292		0.0029267	8.64786	0.151518	1.85031	8.58757	0.969385	0.152038
61114-56A	Trench 1 Step 1	0.0568259	0.0003406	0.0090564	6.13e-05	0.0001999	3.7e-05	-2.53e-05	3.5e-05	0.0001088	5.59732e-06	2.68169	0.192702	42.7782	3.01616		0.365835	0.0262857	0.0262987		0.37	0.0263823		0.0019166	5.24611	0.15952	0.948711	5.2255	0.963036	0.151554
61114-57A	Trench 1 Step 1	0.0313315	0.0003106	0.0088513	5.06e-05	0.0001243	2.64e-05	-2.21431e-06	3.5e-05	4.1e-05	5.16139e-06	2.15491	0.178858	60.9382	5.06058		0.293978	0.0243982	0.0244072		0.296771	0.02569		0.0013083	12.6653	0.282788	1.19187	12.6254	0.992034	0.0885403
61114-58A	Trench 1 Step 1	0.0918796	0.0003106	0.0040712	3.98e-05	9.95e-05	2.59e-05	1.71e-05	3.69e-05	0.0002664	6.30317e-06	3.03335	0.499902	13.4515	2.07823		0.413803	0.0681877	0.0681941		0.414954	0.0679623		0.0028989	2.53761	0.0443454	1.07711	2.64575	0.831014	0.227272
61114-59A	Trench 1 Step 1	0.0750763	0.0003002	0.0113251	9.82e-05	0.0002006	2.59e-05	1.77e-05	3.44e-05	0.000175	7.40608e-06	2.01549	0.202478	30.4306	2.97678		0.274959	0.0276206	0.0276276		0.279116	0.0278576		0.0023302	4.33765	0.150984	0.997792	4.37208	0.944091	0.145883
61114-60A	Trench 1 Step 1	0.0232911	0.0003106	0.0052429	6.41e-05	8.39e-05	2.69e-05	-4.14e-05	3.62e-05	2.74e-05	5.10392e-06	2.87382	0.299521	64.7561	6.74207		0.392042	0.0408558	0.0408654		0.395304	0.0415786		0.0011805	18.6398	0.225331	1.8634	18.6227	0.993373	0.0657552
61115-01A	Trench 1 Step 2	0.11555	0.0003106	0.0059765	7.15e-05	0.0001672	2.59e-05	4.85e-05	3.33e-05	0.0003438	6.84105e-06	2.16431	0.37766	11.203	1.78951		0.29526	0.051517	0.0515213		0.297746	0.0524119		0.0029742	2.18094	0.0517626	1.26873	2.41976	0.747042	0.229299
61115-02A	Trench 1 Step 2	0.0452533	0.000322	0.0071589	4.55e-05	9.74e-05	3.4e-05	3.09e-05	3.38e-05	9.15e-05	6.7624e-06	2.50616	0.288505	39.6819	4.53072		0.341891	0.0393542	0.0393618		0.344862	0.0388144		0.0020203	7.48236	0.158337	0.999036	7.4537	0.980946	0.118019
61115-03A	Trench 1 Step 2	0.0342665	0.0002823	0.0063665	6.69e-05	0.0001072	2.69e-05	-2.49e-05	3.56e-05	8.84e-05	6.92026e-06	1.23176	0.329899	22.9073	6.09298		0.168045	0.045005	0.0450066		0.168914	0.0462225		0.0025822	7.91409	0.185972	1.38073	7.92145	0.975802	0.106583
61115-04A	Trench 1 Step 2	0.0442188	0.0003106	0.0062705	4.22e-05	0.0001328	2.64e-05	-2.31496e-06	3.5e-05	0.0001065	5.66392e-06	1.97975	0.278596	28.0993	3.89757		0.270083	0.0380041	0.038009		0.27603	0.0381269		0.0024083	5.43508	0.141933	1.0177	5.40156	0.963186	0.159311
61115-05A	Trench 1 Step 2	0.0472913	0.0003342	0.0082928	5.59e-05	0.0001237	2.69e-05	3.25e-05	3.33e-05	0.0001008	7.24224e-06	2.07425	0.266521	36.4062	4.63754		0.282975	0.0363567	0.0363623		0.285773	0.0360627		0.00213	7.27721	0.175515	1.02153	7.25189	0.979432	0.11939
61115-06A	Trench 1 Step 2	0.0284099	0.0003053	0.0047986	5.41e-05	4.19e-05	2.69e-05	-3.89e-05	3.5e-05	6.44e-05	6.52993e-06	1.9043	0.413528	32.1958	6.96068		0.259791	0.0564108	0.0564139		0.264009	0.0589926		0.002271	10.2183	0.169069	1.60746	10.2081	0.982208	0.100108
61115-07A	Trench 1 Step 2	0.0260752	0.0002953	0.0064999	6.96e-05	9.58e-05	2.64e-05	6.94481e-06	3.33e-05	5.57e-05	6.45368e-06	1.45306	0.301315	36.2562	7.49376		0.198235	0.0411049	0.0411074		0.197599	0.0434163		0.002135	11.6847	0.249517	1.60934	11.6645	0.986361	0.093462
61115-08A	Trench 1 Step 2	0.0349397	0.000328	0.0050195	5.95e-05	7.81e-05	2.86e-05	-2.54e-05	3.5e-05	9.23e-05	5.53173e-06	1.46745	0.339668	21.1014	4.82938		0.200198	0.0463369	0.0463391		0.20178	0.0474256		0.0026426	6.12836	0.143797	1.56033	6.14611	0.952732	0.14544
61115-09A	Trench 1 Step 2	0.0205593	0.0002864	0.0073813	4.55e-05	6.83e-05	2.64e-05	4.02601e-07	3.38e-05	3.75e-05	5.22015e-06	1.26497	0.215437	45.4641	7.74346		0.172577	0.02939	0.0293926		0.173311	0.0298881		0.0018266	14.0052	0.359407	1.5761	13.9349	0.990757	0.105146
61115-10A	Trench 1 Step 2	0.0496896	0.000328	0.0071166	7.43e-05	9.07e-05	2.55e-05	-4.17e-05	3.28e-05	0.0001231	7.32393e-06	1.81023	0.314856	25.9509	4.45662		0.246959	0.042951	0.0429546		0.250103	0.0431538		0.0024802	6.04206	0.143357	1.27991	6.07185	0.962325	0.120721
61115-11A	Trench 1 Step 2	0.021798	0.0003106	0.0034368	3.54e-05	0.0001127	2.98e-05	-1.52e-05	3.09e-05	5.59e-05	5.4037e-06	1.47952	0.480471	23.349	7.55362		0.201845	0.0655449	0.0655464		0.204237	0.0668198		0.0025674	9.80502	0.157814	1.81239	9.73569	0.976913	0.140486
61115-12A	Trench 1 Step 2	0.0520017	0.0002864	0.0092889	5.15e-05	0.0001345	2.64e-05	3.52e-05	3.22e-05	0.0001051	5.73149e-06	2.22185	0.190148	39.7242	3.34686		0.303109	0.0259382	0.0259472		0.305058	0.0260532		0.0020189	5.55486	0.178789	0.826831	5.52651	0.970515	0.143564
61115-13A	Trench 1 Step 2	0.0363292	0.000328	0.0044096	3.83e-05	9.8e-05	2.8e-05	5.25e-05	3.28e-05	9.07e-05	5.66392e-06	2.10399	0.395266	25.5586	4.75272		0.287031	0.0539189	0.0539228		0.289104	0.0541001		0.0024933	6.37903	0.121477	1.29911	6.34843	0.965257	0.150656
61115-14A	Trench 1 Step 2	0.0463318	0.0002907	0.0083262	7.24e-05	7.1e-05	3.11e-05	9.66231e-06	3.69e-05	8.24e-05	6.84105e-06	2.60908	0.250687	46.9306	4.46598		0.355931	0.0341953	0.0342047		0.357773	0.0353229		0.0017775	8.37671	0.179874	1.11664	8.38017	0.983083	0.0905615
61115-15A	Trench 1 Step 2	0.0171943	0.0003002	0.0057884	4.47e-05	8.6e-05	2.69e-05	-2.61691e-06	3.28e-05	1.47e-05	5.04777e-06	2.20955	0.266374	74.4615	9.04373		0.301431	0.0363362	0.0363426		0.30434	0.0358802		0.0008554	34.3918	0.336999	1.96853	34.3494	0.997883	0.0515562
61115-16A	Trench 1 Step 2	0.0421961	0.0003162	0.0076989	4.89e-05	9.42e-05	2.59e-05	4.51e-05	3.18e-05	9.35e-05	6.84105e-06	1.85624	0.270928	33.8986	4.90886		0.253236	0.0369584	0.0369629		0.258547	0.0358495		0.002214	7.41323	0.182619	1.02744	7.38032	0.980054	0.122853
61115-17A	Trench 1 Step 2	0.0860732	0.0003895	0.003962	6.04e-05	9.78e-05	2.8e-05	-3.34e-05	3.22e-05	0.000259	6.15549e-06	2.19634	0.504977	10.1188	2.18587		0.299629	0.0688843	0.0688876		0.303584	0.0700139		0.0030105	2.56456	0.0460713	1.6364	2.90937	0.753611	0.193385
61115-18A	Trench 1 Step 2	0.0426169	0.000328	0.0051355	3.75e-05	0.0001039	2.51e-05	4.16e-05	3.44e-05	0.0001088	5.46717e-06	1.97963	0.32975	23.8755	3.916		0.270068	0.0449821	0.0449862		0.271837	0.045858		0.0025497	5.16417	0.120606	1.10655	5.12695	0.955627	0.173932
61115-19A	Trench 1 Step 2	0.0335708	0.0003106	0.0034848	4.63e-05	7.16e-05	2.75e-05	5.07e-05	3.28e-05	6.07e-05	6.7624e-06	4.44036	0.59169	46.129	6.10468		0.605711	0.0806991	0.0807107		0.608874	0.0801186		0.0018044	11.2383	0.103886	1.66871	11.2658	0.98455	0.0745119
61115-20A	Trench 1 Step 2	0.0843892	0.0003106	0.0070984	4.55e-05	0.0001222	2.64e-05	3.14e-05	3.22e-05	0.0001934	7.65506e-06	3.75205	0.334711	31.5867	2.73739		0.511833	0.0456528	0.0456674		0.515652	0.046034		0.0022914	4.0664	0.084185	0.783901	4.06275	0.947317	0.166967
61115-21A	Trench 1 Step 2	0.0381908	0.000328	0.0072873	4.38e-05	0.0001223	2.64e-05	2.56e-05	3.13e-05	8.19e-05	7.08025e-06	1.88464	0.295537	35.9945	5.61464		0.25711	0.0403154	0.0403196		0.259653	0.0403705		0.0021438	8.73577	0.190989	1.09462	8.69473	0.984696	0.114939
61115-22A	Trench 1 Step 2	0.0300991	0.000328	0.0079939	4.63e-05	9.8e-05	2.55e-05	-1.24e-05	3.5e-05	5.49e-05	5.28015e-06	1.71184	0.202864	45.5099	5.38046		0.233536	0.0276738	0.0276788		0.236297	0.0285639		0.0018251	9.7172	0.265854	1.28275	9.65438	0.985238	0.123936
61115-23A	Trench 1 Step 2	0.0240136	0.000322	0.0073247	4.3e-05	0.000106	2.55e-05	1.37e-05	3.5e-05	2.76e-05	5.28015e-06	2.15331	0.220591	65.7478	6.76784		0.293759	0.0300911	0.0300984		0.296429	0.0314842		0.0011472	19.2417	0.305334	1.51601	19.1935	0.995363	0.0743853
61115-24A	Trench 1 Step 2	0.0225902	0.0003106	0.0064626	6.04e-05	3.33e-05	3.32e-05	2.7e-05	3.5e-05	4.13e-05	5.4037e-06	1.58827	0.25551	45.4818	7.30936		0.21668	0.0348559	0.0348594		0.219394	0.0349779		0.001826	13.2076	0.28636	1.71646	13.1546	0.988282	0.103038
61115-25A	Trench 1 Step 2	0.0643964	0.0003406	0.0079357	6.13e-05	0.0001328	2.8e-05	1.53e-05	3.38e-05	0.0001627	6.08276e-06	1.99467	0.240043	24.6024	2.87548		0.27212	0.0327449	0.0327507		0.27456	0.0343188		0.0025254	3.87401	0.12334	0.980043	3.87559	0.930539	0.18718
61115-26A	Trench 1 Step 2	0.0392704	0.0003162	0.0042196	6.22e-05	5.95e-05	2.92e-05	1.9123e-06	3.28e-05	9.66e-05	5.46717e-06	2.46916	0.40088	26.5546	4.24422		0.336844	0.0546832	0.0546885		0.340012	0.0550402		0.00246	5.78294	0.107545	1.72923	5.89122	0.939761	0.122444
61115-27A	Trench 1 Step 2	0.0875766	0.0003748	0.0060149	7.15e-05	9.05e-05	3.25e-05	-2.62e-05	3.5e-05	0.0002658	6.60682e-06	1.36103	0.353351	9.35612	2.29552		0.185681	0.0482038	0.0482057		0.186865	0.049997		0.003036	2.66196	0.0687428	1.30666	2.83701	0.814832	0.210839
61115-28A	Trench 1 Step 2	0.0609596	0.0003538	0.0044874	3.91e-05	6.33e-05	2.69e-05	3.08e-05	3.69e-05	0.0001264	5.73149e-06	5.1752	0.400787	38.1269	2.87875		0.705932	0.0546594	0.0546826		0.714108	0.0552798		0.0020724	4.65446	0.0736722	1.08958	4.66713	0.946755	0.156517
61115-29A	Trench 1 Step 2	0.0483483	0.000322	0.0059542	4.47e-05	9.79e-05	2.55e-05	3.71e-05	3.38e-05	0.0001193	6.45368e-06	2.1409	0.333119	26.388	4.04814		0.292066	0.0454412	0.045446		0.294697	0.0448952		0.0024656	5.52331	0.123257	1.04738	5.50547	0.963435	0.148217
61115-30A	Trench 1 Step 2	0.0366566	0.0003162	0.0076334	7.24e-05	0.0001332	2.59e-05	1.54e-05	3.33e-05	7.72e-05	6.52993e-06	1.78381	0.260968	37.181	5.40266		0.243354	0.0355999	0.0356041		0.247566	0.0361158		0.0021041	8.55683	0.208436	1.3288	8.54735	0.980218	0.105687
61115-31A	Trench 1 Step 2	0.0241408	0.0003053	0.004494	3.75e-05	7.66e-05	2.64e-05	-4.46e-05	3.18e-05	3.89e-05	5.28015e-06	2.77431	0.35925	51.6981	6.69182		0.378469	0.0490034	0.0490108		0.379225	0.0492103		0.0016178	13.6119	0.186346	1.56685	13.565	0.990302	0.0946677
61115-32A	Trench 1 Step 2	0.0184761	0.0003162	0.0063214	4.47e-05	9.36e-05	2.64e-05	2.5e-05	3.33e-05	2.41e-05	5.22015e-06	1.78739	0.252365	61.2172	8.68335		0.243843	0.0344263	0.0344307		0.247692	0.0353161		0.001299	21.8467	0.342494	1.91067	21.7806	0.994982	0.0804363
61115-33A	Trench 1 Step 2	0.0971636	0.0003748	0.0064615	7.24e-05	0.0001452	2.75e-05	-3.01951e-07	3.38e-05	0.000277	6.30317e-06	2.23441	0.318855	14.8719	1.97804		0.304822	0.0434952	0.0435006		0.308484	0.0455965		0.0028513	2.46	0.0665585	1.2283	2.6245	0.798575	0.227441
61115-34A	Trench 1 Step 2	0.0531059	0.0003471	0.0073543	7.15e-05	7.31e-05	3.47e-05	-1.47e-05	3.28e-05	0.0001305	5.86941e-06	1.91866	0.248585	26.5948	3.37254		0.26175	0.0339104	0.0339155		0.266356	0.0337933		0.0024586	4.62425	0.138611	1.21577	4.64785	0.939437	0.161241
61115-35A	Trench 1 Step 2	0.0194202	0.0003002	0.0042737	3.83e-05	3.82e-05	2.59e-05	2.01295e-06	3.56e-05	3.04e-05	5.10392e-06	2.41573	0.364954	53.2125	8.05026		0.329556	0.0497828	0.0497884		0.335563	0.0526244		0.0015671	16.8728	0.220275	1.84296	16.8134	0.992031	0.0911511
61115-36A	Trench 1 Step 2	0.0268418	0.0003002	0.0084596	4.63e-05	0.0001283	2.75e-05	-1.38e-05	3.13e-05	3.08e-05	5.16139e-06	2.08276	0.186502	65.7096	5.90274		0.284135	0.025441	0.0254491		0.286738	0.0257431		0.0011485	16.8093	0.315493	1.29399	16.77	0.99503	0.0736418
61115-37A	Trench 1 Step 2	0.0358531	0.0003002	0.0051972	4.06e-05	0.0001375	2.64e-05	2.35e-05	3.22e-05	0.0001044	5.53173e-06	0.901434	0.32739	13.0786	4.68834		0.122981	0.0446639	0.0446648		0.123848	0.0448383		0.0029114	5.43643	0.145087	1.19081	5.39785	0.956667	0.171999
61115-38A	Trench 1 Step 2	0.0206188	0.0003106	0.0067325	4.06e-05	7.73e-05	2.64e-05	-2.8e-05	3.38e-05	2.84e-05	5.22015e-06	1.79899	0.23683	58.8043	7.76912		0.245425	0.0323072	0.0323119		0.248567	0.032366		0.0013798	18.4405	0.326875	1.67779	18.3772	0.994187	0.0859246
61115-39A	Trench 1 Step 2	0.04168	0.0002864	0.0071457	4.89e-05	0.000106	2.75e-05	5.83766e-06	3.5e-05	9.06e-05	5.53173e-06	2.04613	0.237834	35.1118	4.03309		0.279139	0.0324435	0.0324496		0.281813	0.0340323		0.0021734	6.20695	0.171601	1.0142	6.1807	0.971908	0.137272
61115-40A	Trench 1 Step 2	0.0375463	0.0003053	0.0060742	6.78e-05	8.33e-05	2.64e-05	-3.95e-05	3.33e-05	9.47e-05	5.46717e-06	1.51951	0.277281	24.6063	4.43245		0.207301	0.037826	0.0378289		0.21082	0.0379899		0.0025252	5.88901	0.161935	1.42687	5.91303	0.954599	0.13846
61115-41A	Trench 1 Step 2	0.040743	0.000322	0.0060511	7.06e-05	0.0001097	2.64e-05	9.76296e-06	3.28e-05	9.4e-05	5.34135e-06	2.09667	0.273624	31.1679	4.00587		0.286033	0.0373255	0.037331		0.289986	0.0371037		0.0023055	5.80753	0.148654	1.45515	5.84543	0.952242	0.13496
61115-42A	Trench 1 Step 2	0.0566094	0.0003538	0.006978	5.06e-05	0.0001146	2.8e-05	8.97e-05	3.5e-05	0.0001394	5.66392e-06	2.15748	0.254244	26.6158	3.06054		0.294329	0.0346816	0.034688		0.297195	0.0353514		0.0024579	4.20795	0.123365	1.00167	4.18665	0.939584	0.189619
61115-44A	Trench 1 Step 2	0.0321956	0.0003053	0.0096313	5.32e-05	0.0001526	2.92e-05	-2.81821e-06	3.5e-05	5.14e-05	5.04777e-06	1.74818	0.160945	52.3503	4.80868		0.238494	0.0219554	0.021962		0.240731	0.0215191		0.001596	9.91206	0.299457	1.14453	9.8643	0.987542	0.109955
61115-45A	Trench 1 Step 2	0.0339043	0.0003406	0.0048873	4.06e-05	0.0001108	2.75e-05	-2.16e-05	3.56e-05	9.05e-05	6.68431e-06	1.40317	0.417409	20.2456	5.98063		0.191429	0.0569424	0.0569441		0.196052	0.059487		0.0026713	7.50168	0.144285	1.35119	7.45756	0.973623	0.140936
61115-46A	Trench 1 Step 2	0.0330423	0.0003162	0.0060071	4.22e-05	5.32e-05	2.64e-05	-1.26e-05	3.44e-05	7.43e-05	5.46717e-06	1.80558	0.279371	32.8569	5.04796		0.246324	0.0381104	0.0381144		0.249124	0.0380502		0.0022489	7.47295	0.181974	1.23409	7.4215	0.976127	0.141275
61115-47A	Trench 1 Step 2	0.016908	0.0003002	0.0052973	6.04e-05	6.61e-05	2.92e-05	2.93e-05	3.38e-05	1.99e-05	6.22897e-06	2.0744	0.356716	65.0556	11.2126		0.282995	0.0486603	0.0486645		0.287883	0.0503444		0.0011704	31.5513	0.313612	2.17226	31.5151	0.99706	0.0534233
61115-48A	Trench 1 Step 2	0.0451763	0.0003342	0.0041005	3.98e-05	5.93e-05	2.75e-05	4.54e-05	3.33e-05	0.0001145	5.59732e-06	2.68458	0.423547	24.3868	3.78137		0.366229	0.0577742	0.0577802		0.367571	0.0570716		0.0025326	5.0237	0.0908403	1.26578	5.03263	0.946042	0.160236
61115-50A	Trench 1 Step 2	0.0536621	0.0002702	0.0053321	3.98e-05	8.34e-05	2.14e-05	-2.37e-05	3.11e-05	0.0001451	6.32535e-06	1.93171	0.365348	19.2122	3.55897		0.263531	0.0498383	0.0498419		0.26549	0.0482515		0.0027059	4.46843	0.0994567	0.944371	4.4683	0.949462	0.160716
61115-51A	Trench 1 Step 2	0.0294187	0.0002476	0.0058969	5.07e-05	7.25e-05	2.27e-05	-1.17e-05	3.34e-05	6.04e-05	5.90762e-06	1.92829	0.303937	38.69	6.06787		0.263064	0.0414611	0.0414654		0.264536	0.0412679		0.0020535	9.85628	0.200644	1.24883	9.84141	0.986146	0.092869
61115-52A	Trench 1 Step 2	0.02583	0.0002335	0.0083316	7.74e-05	7.8e-05	2.02e-05	2.89e-05	3.11e-05	4.05e-05	5.69386e-06	1.65086	0.207112	53.3045	6.66632		0.225219	0.0282534	0.028258		0.226703	0.0277665		0.001564	14.1553	0.322889	1.34258	14.1455	0.992681	0.0666645
61115-53A	Trench 1 Step 2	0.0248705	0.0002335	0.0071207	3.3e-05	6.4e-05	2.2e-05	1.79e-05	3.41e-05	2.25e-05	5.90762e-06	2.54998	0.250457	73.083	7.19239		0.347869	0.0341642	0.0341732		0.350799	0.0333296		0.0009016	26.388	0.286602	1.09397	26.3686	0.998329	0.0418291
61115-54A	Trench 1 Step 2	0.0243007	0.000191	0.0082692	4.25e-05	8.28e-05	2.08e-05	-1.2078e-06	3.34e-05	4.76e-05	5.90762e-06	1.21914	0.21524	41.5303	7.31301		0.166324	0.0293632	0.0293656		0.169688	0.0307959		0.0019584	12.4734	0.340651	0.984957	12.4457	0.993242	0.07778
61115-55A	Trench 1 Step 2	0.0147981	0.0002941	0.0055318	5.91e-05	7.42e-05	2.08e-05	5.07e-05	3.11e-05	2.77e-05	5.59464e-06	1.18524	0.3073	44.3518	11.5089		0.161699	0.0419223	0.0419238		0.164965	0.0418723		0.0018639	20.4121	0.374201	2.32297	20.3313	0.992147	0.0943129
61115-56A	Trench 1 Step 2	0.0307415	0.0002335	0.0079482	7.06e-05	0.0001174	2.2e-05	-2.89e-05	3.34e-05	4.02e-05	5.74543e-06	2.35215	0.219523	60.8781	5.65498		0.320883	0.0299449	0.0299536		0.324433	0.0317598		0.0013104	14.3142	0.258819	1.2137	14.3106	0.993649	0.0590091
61115-57A	Trench 1 Step 2	0.0244158	0.0002202	0.0046066	3.72e-05	7.32e-05	2.14e-05	-2.42e-05	3.22e-05	4.17e-05	6.65282e-06	2.59184	0.435095	48.9494	8.20165		0.353579	0.0593498	0.0593552		0.356628	0.060061		0.0017099	15.9889	0.18886	1.25722	15.9734	0.994696	0.0612463
61115-58A	Trench 1 Step 2	0.02579	0.0002335	0.0062093	4.52e-05	7.91e-05	2.2e-05	-3.33e-05	3e-05	4.41e-05	6.5192e-06	2.02812	0.316732	48.8804	7.61903		0.276682	0.0432062	0.0432108		0.277851	0.0436378		0.0017122	14.8211	0.241014	1.20785	14.7999	0.994103	0.067869
61115-60A	Trench 1 Step 2	0.0320694	0.000255	0.0076611	4.79e-05	8.25e-05	2.02e-05	2.8e-05	2.95e-05	5.3e-05	6.58559e-06	2.12127	0.260012	50.7246	6.19998		0.289389	0.0354686	0.0354746		0.295542	0.0361241		0.0016504	12.5014	0.239124	1.05722	12.4784	0.992801	0.0758163
Omitted Analyses:
61114-02A	Trench 1 Step 1	0.0114793	0.0002267	0.0026588	3.75e-05	7.09e-05	2.55e-05	-2.69e-05	4e-05	2.57e-05	5.3535e-06	1.42028	0.608058	32.9289	14.0902		0.193764	0.0829505	0.0829516		0.195081	0.0848598		0.0022465	20.8825	0.231847	2.49539	20.826	0.991547	0.0858898
61114-07A	Trench 1 Step 1	0.0083326	0.0001933	0.0045732	4.22e-05	8.16e-05	2.59e-05	3.5e-05	3.77e-05	1.63e-05	5.3535e-06	0.761343	0.352218	41.8318	19.3641		0.10387	0.0480515	0.048052		0.105403	0.0502315		0.0019483	33.0916	0.549448	2.56966	33.0144	0.996464	0.069853
61114-09A	Trench 1 Step 1	0.0132793	0.0002404	0.0039339	4.3e-05	5.12e-05	3.55e-05	-1.72e-05	3.83e-05	1.76e-05	5.40833e-06	2.03687	0.415876	60.4021	12.3538		0.277876	0.0567306	0.0567341		0.279983	0.0584218		0.0013263	30.787	0.296543	2.17756	30.7459	0.9969	0.0564215
61114-16A	Trench 1 Step 1	0.0129232	0.0002335	0.0048048	4.22e-05	8.33e-05	2.98e-05	-2.16e-05	3.88e-05	2e-05	5.3e-06	1.44348	0.333408	53.7247	12.4274		0.196928	0.045483	0.0454851		0.199434	0.0470438		0.0015499	26.55	0.372189	2.07028	26.4943	0.996153	0.0678824
61114-18A	Trench 1 Step 1	0.0113603	0.0002267	0.0029762	3.4e-05	2.27e-05	3.62e-05	1.39e-05	3.62e-05	1.93e-05	5.58032e-06	1.88163	0.565679	49.3418	14.8456		0.2567	0.0771665	0.0771687		0.260149	0.0801698		0.0016968	29.0446	0.262228	2.36562	28.9901	0.996008	0.0657372
61114-21A	Trench 1 Step 1	0.0118539	0.000214	0.0042133	3.98e-05	7.28e-05	2.64e-05	-9.25977e-06	3.58e-05	1.12e-05	5.3e-06	2.01343	0.379585	71.6389	13.5443		0.274678	0.0517802	0.0517839		0.277831	0.0516546		0.0009499	47.1313	0.355805	2.09971	47.1013	0.998753	0.0377769
61114-24A	Trench 1 Step 1	0.008961	0.0002081	0.0035742	5.59e-05	1.75e-05	2.59e-05	-3.34e-05	3.62e-05	6.97e-06	5.3535e-06	1.91588	0.451985	76.5028	18.0907		0.261371	0.0616569	0.0616597		0.264729	0.0620173		0.000787	75.9859	0.399309	2.87606	75.963	0.999186	0.0276347
61114-30A	Trench 1 Step 1	0.0127323	0.0002335	0.0027371	3.47e-05	3.45e-05	2.75e-05	1.99e-05	3.67e-05	2.08e-05	5.3535e-06	2.38858	0.591441	51.3936	12.7325		0.325852	0.0806777	0.080681		0.323997	0.0829838		0.001628	25.9171	0.215164	2.29216	25.8747	0.995242	0.065623
61114-34A	Trench 1 Step 1	0.0118067	0.0002202	0.0035388	3.75e-05	5.52e-05	2.59e-05	1.53e-05	3.77e-05	1.38e-05	5.3e-06	2.17363	0.452265	65.2133	13.5981		0.296531	0.0616939	0.0616976		0.29908	0.0635082		0.0011651	38.5988	0.30002	2.20931	38.5623	0.997982	0.046722
61114-38A	Trench 1 Step 1	0.0128134	0.0002476	0.0022557	5.06e-05	5.47e-05	2.59e-05	-1.06e-05	3.77e-05	2.96e-05	5.64004e-06	1.76316	0.756456	31.0674	13.3076		0.240538	0.103192	0.103193		0.241906	0.104407		0.0023088	19.1913	0.176203	3.03515	19.2168	0.985983	0.075968
61114-45A	Trench 1 Step 1	0.009863	0.0002025	0.0024049	3.47e-05	8.17e-05	2.59e-05	-1.2e-05	3.77e-05	2.3e-05	6.22415e-06	1.2405	0.777667	30.2773	18.9744		0.169238	0.10609	0.10609		0.174976	0.109235		0.0023353	27.1263	0.244073	2.57776	27.0783	0.99471	0.0686963
61114-46A	Trench 1 Step 1	0.0073159	0.000214	0.0019696	3.26e-05	6.17e-05	2.64e-05	-0.0001023	3.88e-05	1.66e-05	6.29365e-06	1.16126	0.960116	31.3033	25.8838		0.158428	0.13098	0.130981		0.153144	0.133497		0.0023009	37.53	0.269562	3.45212	37.4435	0.995361	0.0720845
61114-40aB	Trench 1 Step 1	0.0041747	0.0002025	0.0007338	2.87e-05	-1.02e-05	2.75e-05	-6.17e-05	3.62e-05	9.75e-06	5.46443e-06	1.65961	2.24	29.2132	39.4323		0.226412	0.305573	0.305573		0.240304	0.314018		0.0023709	55.4541	0.176025	6.37717	55.37	0.993195	0.0712394
61114-41aB	Trench 1 Step 1	0.0012797	0.0002025	0.0003652	2.77e-05	0	2.59e-05	-1.58e-05	3.67e-05	4.55e-06	5.95483e-06	-0.246796	4.89679	-7.05224	139.928		-0.0336715	0.668098	0.668098		0.00670618	0.661108		0.0035856	130.837	0.285753	17.9936	130.053	0.990471	0.112183
61114-42aB	Trench 1 Step 1	0.0010477	0.0001972	0.0003465	2.77e-05	1.16e-05	2.64e-05	-4.32796e-06	3.77e-05	2.99988e-08	5.3e-06	2.98731	4.60781	98.8973	153.464		0.407523	0.628517	0.628518		0.413511	0.603311		3.69e-05	13703.1	0.331058	20.9789	13703.1	0.999999	0.0013001
61115-43A	Trench 1 Step 2	0.0053179	0.0002823	0.0038519	3.83e-05	-9.0158e-06	3.11e-05	1.1e-05	3.33e-05	5.60001e-07	5.53173e-06	1.33676	0.435262	96.9523	31.9698		0.182369	0.0593782	0.0593796		0.182943	0.0593204		0.0001021	1019.75	0.725279	5.54857	1019.73	0.999985	0.0052891
61115-49A	Trench 1 Step 2	0.0077962	0.0002081	0.0004592	2.25e-05	1.26e-05	1.96e-05	-5.27e-05	3.16e-05	5.1e-05	5.59464e-06	-16.2392	3.75787	-95.815	21.7544		-2.21693	0.51333	0.513354		-2.25581	0.511337		0.0065586	11.3129	0.0590022	5.69284	12.0418	0.87889	0.126044
61115-59A	Trench 1 Step 2	0.0011058	0.0001972	0.0002512	2.2e-05	2.02604e-07	2.02e-05	8.95782e-06	3.11e-05	-2.19e-06	5.54707e-06	7.02705	6.6679	159.775	153.604		0.958469	0.909241	0.909243		0.951974	0.926958		-0.0020021	-251.312	0.227371	20.3642	-250.804	0.996703	0.0655576
